# Supplementary material for: Heterogeneity of miRNA expression in localized prostate cancer with clinicopathological correlations
Source: PLoS One. 2017 Jun 19;12(6):e0179113. doi: 10.1371/journal.pone.0179113 (PMC5476257; doi:10.1371/journal.pone.0179113)
Supplement: S4 Dataset — (XLSX) [file pone.0179113.s007.xlsx]

## Sheet: Ark1
Id	Prebiopsy PSA	pT	GS (NB)	GS (Prostate)	D'amico risk profile	NCCN risk profile	Relapse	Value of the last PSA	Died	Cause of death	miR-21	miR-34a	miR-145	miR-143	miR-125b	miR-126
701	3.9	pT2b	7 (3+4)	7 (3+4)	Intermediate	intermediate	Yes	1.2	%	%	0.0755646	0.323179	0.103115	0.159314	7.91009e-05	0.00185187
706	8.1	pT2c	6 (3+3)	7 (3+4)	Low	Low	%	<0.1	Yes	Hjertestop	0.0297639	0.316537	0.0782109	0.212397	2.41524e-05	0.000220597
730	7.7	pT2c	6 (3+3)	7 (4+3)	Low	Low	%	<0.1	%	%	0.0404426	0.104183	0.00746269			2.15231e-05
734	9.2	pT2b	7 (3+4)	7 (3+4)	Intermediate	intermediate	%	<0.1	%	%	0.0407791	0.177479	0.15623	0.301051	0.000279006	0.00294126
739	5.2	pT2a	7 (3+4)	7 (4+3)	Intermediate	intermediate	%	<0.1	%	%	0.0591063	0.274694	0.174024	0.296541	0.00016344	0.00237368
741	19	pT2c	6 (3+3)	7 (3+4)	Intermediate	intermediate	%	<0.1	Yes	Pnuemoni
748	9.5	pT2c	7 (3+4)	7 (3+4)	Intermediate	intermediate	Yes	13.0	%	%	0.0869882	0.117054	0.113735	0.251093	4.52398e-05	0.000482393
751	17	pT2b	7 (3+4)	7 (3+4)	Intermediate	intermediate	Yes	<0.1	%	%	0.0522871	0.222685	0.244394	0.348672	0.000120954	0.000286619
753	8.9	pT2c	7 (3+4)	7 (3+4)	Intermediate	intermediate	Yes	1.0	%	%	0.0911465	0.175861	0.0648515	0.066908	3.08553e-05	0.000388736
755	11	pT2c	6 (3+3)	7 (3+4)	Intermediate	intermediate	%	<0.1	%	%	0.0652076	0.292084	0.224239	0.307518	0.000251985	0.000579752
757	3.7	pT2b	7 (3+4)	7 (3+4)	Intermediate	intermediate	%	<0.1	%	%	0.116859	0.186216	0.248656	0.302607	0.00095881	0.000357904
777	13	pT3b	7 (3+4)	7 (4+3)	Intermediate	intermediate	Yes	1.3	%	%	0.135526	0.3269	0.115662	0.313019	0.000139593	0.000982458
786	15	pT2c	7 (3+4)	7 (3+4)	Intermediate	intermediate	%	<0.1	%	%	0.0529565	0.244357	0.164161	0.342529	3.58268e-05	0.0004643
789	70	pT3b	7 (4+3)	7 (4+3)	High	High	Never radical ttt	2.8	%	%	0.065798	0.140628	0.213069	0.26653	5.05911e-05	0.000937647
801	16	pT2c	7 (4+3)	7 (3+4)	Intermediate	intermediate	Yes	1.1	%	%	0.0741075	0.173422	0.164337	0.28225	0.000147199	0.00103367
806	2.2	pT2a	6 (3+3)	6 (3+3)	Low	Very Low	%	<0.1	%	%	0.114997	0.153918	0.240267	0.361835	0.000270267	0.000320438
820	25.6	pT3b	7 (4+3)	7 (3+4)	High	High	Yes	0.36	%	%	0.049218	0.28492	0.0797169	0.0859063	0.000168111	0.00133044
821	8	pT2c	7 (3+4)	6 (3+3)	Intermediate	intermediate	%	<0.1	%	%	0.00421561	0.146233	0.135976	0.141681	0.000159599	0.00040125
846	13	pT2c	7 (3+4)	7 (4+3)	Intermediate	intermediate	%	<0.1	Yes	Diss. C. pancrease	0.101434	0.302739	0.290877	0.475079	0.000305566	0.0012743
879	7	pT2c	7 (3+4)	7 (3+4)	High	intermediate	%	<0.1	%	%	0.0931765	0.28085	0.214343	0.434097	3.53501e-05	0.000737573
882	7.8	pT2c	6 (3+3)	7 (3+4)	Low	Low	%	<0.1	%	%	0.0773402	0.126375	0.135744	0.262218	0.00010761	0.00109806
901	6.5	pT2c	7 (4+3)	7 (3+4)	Intermediate	intermediate	%	<0.1	%	%	0.0316432	0.139854	0.15068	0.224444	8.49575e-05	0.000247615
902	30	pT2c	6 (3+3)	7 (3+4)	High	High	Never radical ttt	12.0	%	%	0.0182784	0.260129	0.109476	0.213512	0.000276409	0.000613537
909	10	pT2a	6 (3+3)	7 (3+4)	Intermediate	intermediate	%	<0.1	%	%	0.0769626	0.304015	0.295336	0.423068	0.000528737	0.000528173
915	10	pT3a	7 (4+3)	7 (4+3)	Intermediate	intermediate	%	<0.1	%	%	0.0654779	0.109465	0.264037	0.517791	2.52433e-05	0.000582672
928	10	pT2c	6 (3+3)	7 (3+4)	Intermediate	intermediate	%	<0.1	%	%	0.137008	0.125983	0.0835662	0.24648	6.77751e-05	0.000592652
929	9.5	pT2c	7 (3+4)	7 (3+4)	Intermediate	intermediate	Yes	<0.1	%	%	0.0172809	0.0903047	0.132257	0.197406	0.000363179	0.00095564
943	6.7	pT2c	6 (3+3)	7 (3+4)	Low	Low	%	<0.1	%	%	0.0639763	0.228134	0.340124	0.506668	0.000709763	0.00145607
953	16.2	pT2c	6 (3+3)	7 (4+3)	Intermediate	intermediate	Yes	0.89	%	%	0.0567673	0.337581	0.0955107	0.315131	0.000162624	0.000300457
961	11	pT2c	6 (3+3)	7 (3+4)	Intermediate	intermediate	Yes	<0.1	%	%	0.0424268	0.352284	0.231001	0.327076	0.000163221	0.000913784
972	20	pT3b	8 (3+5)	7 (3+4)	High	High	Never radical ttt	9.1	Yes	N/A	0.0723053	0.133562	0.175143	0.270252	0.000257439	0.00093186
985	5.4	pT2c	6 (3+3)	7 (4+3)	Low	Very Low	Yes	<0.1	%	%	0.0913775	0.162334	0.179611	0.250942	0.000210772	0.00190648
987	11	pT2c	7 (3+4)	7 (4+3)	Intermediate	intermediate	Yes	1.6	%		0.0382619	0.222485	0.17965	0.210761	0.000187619	0.000252333
1000	5.8	pT2c	6 (3+3)	7 (3+4)	Low	Low	%	<0.1	%	%	0.0429689	0.344939	0.0653867	0.183563	0.00023573	0.00141091
1001	10.1	pT2c	6 (3+3)	7 (3+4)	Intermediate	intermediate	Never radical ttt	3.0	%	%	0.0462107	0.129746	0.214067	0.3312	0.000372269	0.000307049
1010	12	pT2b	6 (3+3)	7 (3+4)	Intermediate	intermediate	Yes	<0.1	%	%	0.046205	0.128197	0.0939785	0.186082	0.000609629	0.000678731
1011	1.5	pT2c	7 (3+4)	7 (3+4)	Intermediate	intermediate	%	<0.1	Yes	Hjetrestop diss. m.m	0.0809071	0.169237	0.363311	0.415574	0.000103976	0.000423133
1014	6.2	pT2c	6 (3+3)	7 (3+4)	Low	Low	%	<0.1	%	%	0.0447844	0.352836	0.108946	0.304781	0.000238261	9.52626e-05
1023	9	pT2c	7 (3+4)	7 (3+4)	Intermediate	intermediate	Yes	<0.1	%	%	0.233365	0.490265	0.210725	0.566037	0.000744931	0.000979062
1034	8.6	pT2a	6 (3+3)	7 (3+4)	high	High	%	<0.1	Yes	Hjertestop	0.0591749	0.371072	0.126085	0.250988	0.000373948	0.00112449
1036	6.3	pT2c	6 (3+3)	6 (3+3)	Low	Very Low	%	<0.1	%	%
1042	8	pT2c	7 (3+4)	7 (3+4)	Intermediate	intermediate	%	<0.1	%	%	0.0815985	0.258813	0.17074	0.355773	9.34989e-05	0.00167174
1063	9.6	pT2a	6 (3+3)	7 (3+4)	Low	Low	%	<0.1	%	%	0.000546312	0.189192	0.106931	0.463439	7.79896e-05
1066	5.8	pT2c	6 (3+3)	7 (4+3)	Low	Very Low	Yes	2.2	%	%		0.486828	0.204618	0.348845	0.00094863	0.00111685
1073	7.9	pT2c	6 (3+3)	7 (3+4)	High	intermediate	%	<0.1	%	%	0.0650821	0.277881	0.267949	0.48351	9.48569e-05	0.00182668
1083	11	pT2c	7 (3+4)	7 (3+4)	Intermediate	intermediate	%	<0.1	Yes	N/A	0.0507913	0.214921	0.425789	0.196912	0.000271418	0.000634595
1085	19.5	pT3b	9 (4+5)	9 (4+5)	High	High	Yes	0.29	%	%	0.0770987	0.220136	0.230893	0.471293	8.08298e-05	0.000379632
1087	16	pT2c	6 (3+3)	7 (3+4)	Intermediate	intermediate	Yes	6.9	%	%	0.0828107	0.432932	0.122773	0.296268	5.71523e-05	0.00116258
1102	7.9	pT2c	7 (4+3)	7 (4+3)	Intermediate	intermediate	Yes	37.0	%	%	0.043912	0.23431	0.143232	0.219933	0.000113762	0.000604302
1104	19	pT3a	7 (4+3)	7 (3+4)	Intermediate	intermediate	%	<0.1	%	%	0.0754191	0.299443	0.157634	0.27816	9.11055e-05	0.00103405
1113	23.9	pT3a	7 (4+3)	7 (4+3)	High	High	Never radical ttt	0.16	%	%	0.0345726	0.1943	0.0750957	0.250508	0.00112411	0.000833218
1252	9.3	pT2c	7 (3+4)	7 (3+4)	Intermediate	intermediate	Yes	<0.1	%	%	0.062324	0.36651	0.165737	0.235407	0.000606875	0.00120228
1333	14	pT2c	7 (3+4)	7 (3+4)	Intermediate	intermediate	Never radical ttt	<0.1	%	%	0.0209067	0.246082	0.135288	0.255021	2.04512e-05	0.000782123
GS	Gleason score
N/A	Not Available
NB	Needle biopsy
NCCN	National Comprehensive Cancer Network
PSA	Prostate specific antigen
pT	Pathological T-stage
